# Supplementary material for: Headspace Gas Chromatography Coupled to Mass Spectrometry and Ion Mobility Spectrometry: Classification of Virgin Olive Oils as a Study Case
Source: PubMed Central journal article supplement (PMC7555980; doi:10.3390/foods9091288), 2020-09-14
Supplement: foods-09-01288-s001.pdf [file foods-09-01288-s001.pdf]

Supplementary Material

# Headspace gas chromatography coupled to mass spectrometry and ion mobility spectrometry: Classification of virgin olive oils as a study case

María García-Nicolás<sup>1</sup>, Natalia Arroyo-Manzanares<sup>1\*</sup>, Lourdes Arce<sup>2</sup>, Manuel Hernández-Córdoba<sup>1</sup>, Pilar Viñas<sup>1</sup>

<sup>1</sup> Dept. Analytical Chemistry, Faculty of Chemistry, University of Murcia, Murcia, Spain; [maria.garcia66@um.es](mailto:maria.garcia66@um.es) (M.G.-N.); [hcordova@um.es](mailto:hcordova@um.es) (M.H.-C.); [pilarvi@um.es](mailto:pilarvi@um.es) (P.V.)

<sup>2</sup> Dept. Analytical Chemistry, Faculty of Science, Institute of Fine Chemistry and Nanochemistry. International Agrifood Campus of Excellence (ceiA3), University of Córdoba, Córdoba, Spain; [qalarijil@uco.es](mailto:qalarijil@uco.es) (L.A.)

\* Correspondence: [natalia.arroyo@um.es](mailto:natalia.arroyo@um.es) (N.A.-M.)

Received: date; Accepted: date; Published: date

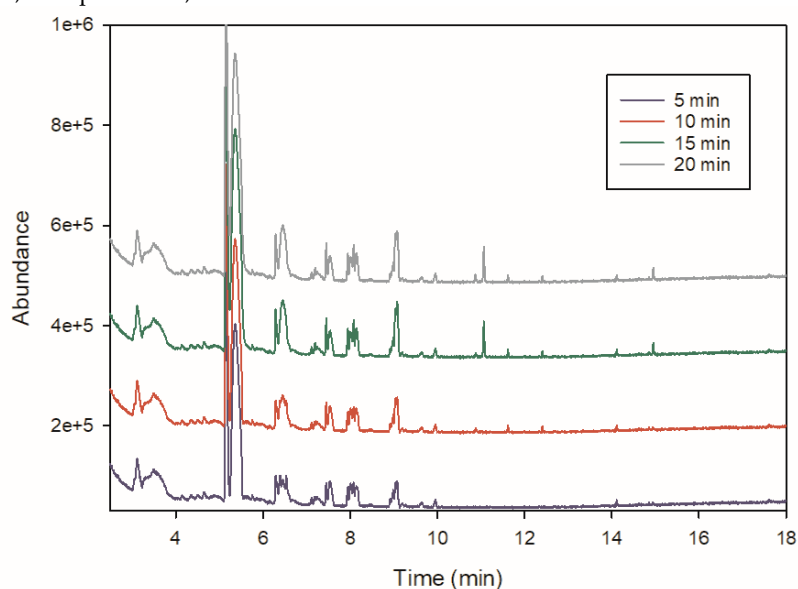

Supplemental Figure S1. HS-GC-MS chromatogram obtained for 5, 10, 15 y 20 minutes of incubation time

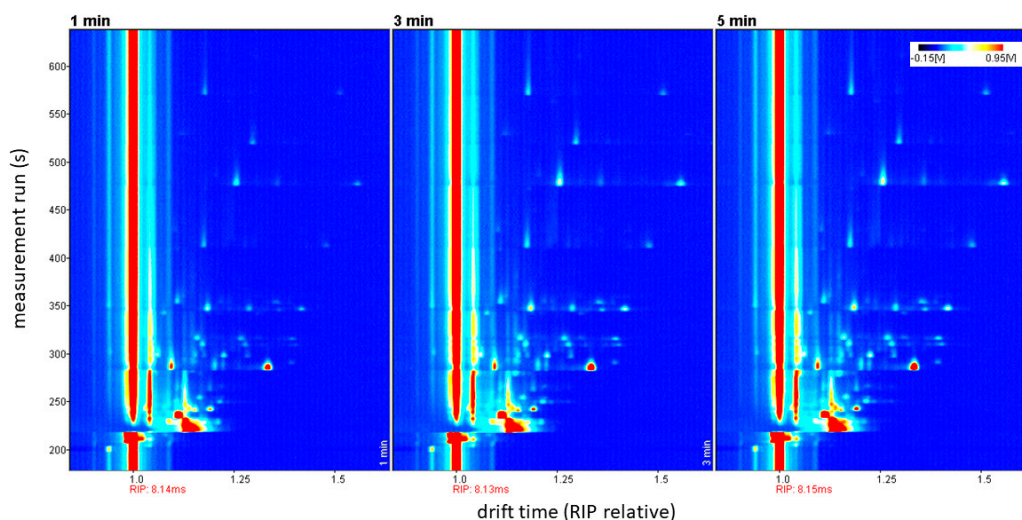

Supplemental Figure S2. HS-GC-IMS spectra obtained for 1, 3 y 5 minutes of incubation time

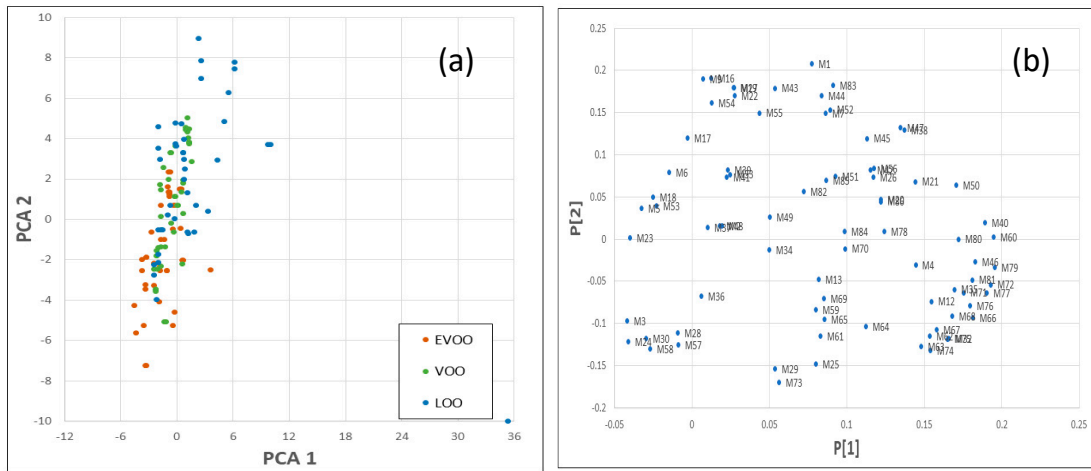

Supplemental Figure S3. PCA scores and loading plot using the HS-GC-IMS markers

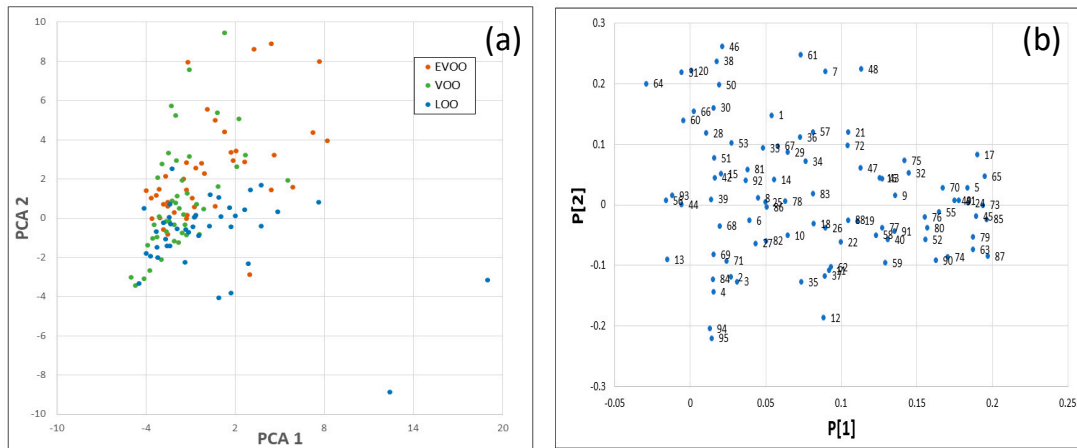

Supplemental Figure S4. PCA scores and loading plot using the peak integration of the HS-GC-MS method

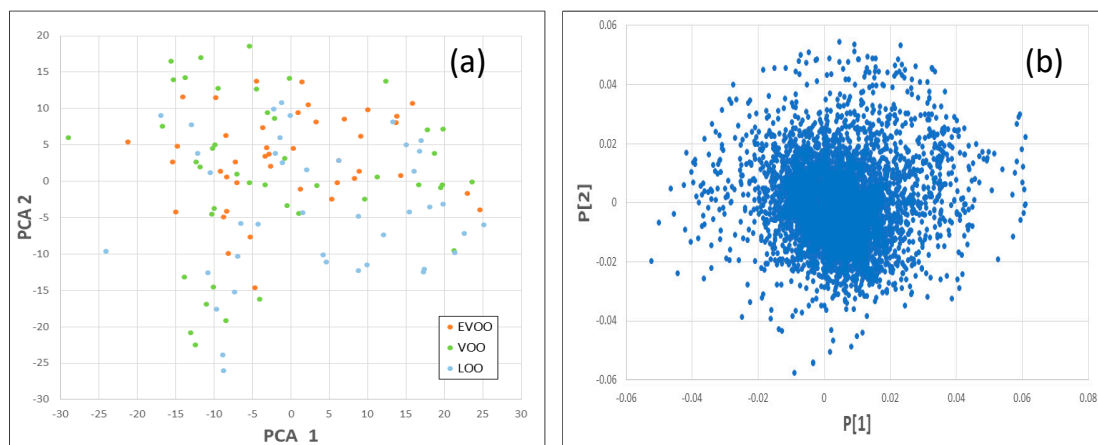

Supplemental Figure S5. PCA scores and loading plot using the TIC of the HS-GC-MS method.

**Supplemental Table S1.** Chemical information of the VOCs monitored

|           |                         | <b>Molecular formula</b>          | <b>Molecular weight</b> | <b><i>m/z</i> theoretical ions</b>               |
|-----------|-------------------------|-----------------------------------|-------------------------|--------------------------------------------------|
| Alcohols  | 1-octanol               | C <sub>8</sub> H <sub>18</sub> O  | 130.22                  | 56, 41, 43, 55, 70, 69, 84, 83, 29, 31           |
|           | 1-pentanol              | C <sub>5</sub> H <sub>12</sub> O  | 88.14                   | 42, 56, 41, 70, 31, 29, 57, 43                   |
|           | 1-hexanol               | C <sub>6</sub> H <sub>14</sub> O  | 102.17                  | 56, 43, 41, 55, 31, 27, 29, 69                   |
|           | 2-methyl-1-butanol      | C <sub>5</sub> H <sub>12</sub> O  | 88.14                   | 57, 41, 56, 70, 29                               |
|           | 3-methyl-1-butanol      | C <sub>5</sub> H <sub>12</sub> O  | 88.14                   | 55, 42, 43, 41, 70, 31, 29, 27, 39, 57           |
|           | trans-2-hexen-1-ol      | C <sub>6</sub> H <sub>12</sub> O  | 100.15                  | 51, 41, 82, 44, 67, 27, 29, 71                   |
|           | cis-2-penten-1-ol       | C <sub>5</sub> H <sub>10</sub> O  | 83.13                   | 57, 41, 39, 44, 29, 58, 67, 55                   |
|           | 2-octanol               | C <sub>8</sub> H <sub>18</sub> O  | 130.22                  | 45, 55                                           |
|           | 1-octen-3-ol            | C <sub>8</sub> H <sub>16</sub> O  | 128.12                  | 57, 43, 72, 85, 41, 29, 99                       |
| Ketones   | 2-butanone              | C <sub>4</sub> H <sub>8</sub> O   | 72.1                    | 43, 72, 29, 57                                   |
|           | 2-pentanone             | C <sub>5</sub> H <sub>10</sub> O  | 86.13                   | 43, 86, 41, 58, 71, 27                           |
|           | 1-penten-3-one          | C <sub>5</sub> H <sub>8</sub> O   | 84.11                   | 55, 27, 84                                       |
|           | 2-hexanone              | C <sub>6</sub> H <sub>12</sub> O  | 100.15                  | 43, 58, 41, 100, 85, 71, 39                      |
|           | 2-heptanone             | C <sub>7</sub> H <sub>14</sub> O  | 114.18                  | 43, 58, 71, 27, 29                               |
|           | 1-octen-3-one           | C <sub>8</sub> H <sub>14</sub> O  | 126.19                  | 55, 70, 27, 43, 41, 39                           |
|           | 2-octanone              | C <sub>8</sub> H <sub>16</sub> O  | 128.21                  | 43, 58, 41, 71, 85                               |
|           | 2-nonanone              | C <sub>9</sub> H <sub>18</sub> O  | 142.23                  | 43, 58, 41, 71, 27, 29, 57, 142                  |
|           | 4-methyl-pentan-2-one   | C <sub>6</sub> H <sub>12</sub> O  | 100.15                  | 43, 58, 41, 85, 100, 39, 29                      |
|           | 6-methyl-5-hepten-2-one | C <sub>8</sub> H <sub>14</sub> O  | 126.19                  | 43, 41, 55, 69, 108, 111, 126, 58                |
| Aldehydes | hexanal                 | C <sub>6</sub> H <sub>12</sub> O  | 100.15                  | 44, 56, 41, 43, 57, 29, 43, 72, 82               |
|           | trans-2-hexen-1-al      | C <sub>6</sub> H <sub>10</sub> O  | 98.14                   | 41, 42, 39, 55, 57, 69, 83, 98                   |
|           | trans-2-pentenal        | C <sub>5</sub> H <sub>8</sub> O   | 84.12                   | 55, 84, 83, 41, 39, 29, 27, 53, 69               |
|           | decanal                 | C <sub>10</sub> H <sub>20</sub> O | 156.26                  | 43, 41, 55, 57, 29, 70, 68, 82, 112, 95          |
|           | trans-2-decenal         | C <sub>10</sub> H <sub>18</sub> O | 154.24                  | 43, 41, 29, 55, 70, 83, 57, 39, 27, 98, 110, 136 |

|                 |                   |          |        |                                                |
|-----------------|-------------------|----------|--------|------------------------------------------------|
|                 | octanal           | C8H16O   | 128.21 | 43, 56, 44, 41, 84, 57, 55, 29, 27, 69, 82     |
|                 | trans-2-heptenal  | C7H12O   | 112.17 | 41, 27, 28, 39, 55, 57, 43, 83, 70             |
|                 | heptanal          | C7H14O   | 114.18 | 70, 41, 44, 43, 55, 57, 29, 39, 27, 81, 86, 96 |
|                 | nonanal           | C9H18O   | 142.24 | 57, 41, 43, 56, 29, 27, 55, 98, 70, 69, 82     |
|                 | trans-2-octenal   | C8H14O   | 126.2  | 41, 55, 70, 83, 29, 57, 39, 67                 |
| Esters          | ethyl acetate     | C4H8O2   | 88.11  | 43, 61, 45, 88, 29, 70                         |
|                 | ethyl butyrate    | C6H12O2  | 116.16 | 71, 43, 88, 29, 60, 73, 41, 45, 101            |
|                 | ethyl isovalerate | C7H14O2  | 130.18 | 88, 57, 29, 85, 60, 41, 70                     |
|                 | 3-hexenyl acetate | C8H14O2  | 142.2  | 43, 41, 53, 55, 69, 67                         |
|                 | propyl butyrate   | C7H14O2  | 130.18 | 43, 71, 27, 89, 41, 60, 39, 29                 |
|                 | hexyl acetate     | C8H16O2  | 144.21 | 43, 56, 55, 61, 84, 69, 42, 41, 73             |
| Monoterpenes    | limonene          | C10H16   | 136.23 | 68, 93, 67, 107, 136, 121, 53, 39              |
| Other compounds | n-octane          | C8H18    | 114.23 | 43, 41, 57, 29, 71, 85                         |
|                 | diethyl phtalate  | C12H14O4 | 222.24 | 149, 177                                       |
